# Supplementary material for: voyAGEr, a free web interface for the analysis of age-related gene expression alterations in human tissues
Source: eLife. 2024 Mar 28;12:RP88623. doi: 10.7554/eLife.88623 (PMC10977969; doi:10.7554/eLife.88623)
Supplement: Supplementary file 1. — For each tissue, we kept the genes with at least one CPM of expression in at least 40% of the samples. [file elife-88623-supp1.csv]

Tissue	#Genes
Adipose - Subcutaneous	15519
Adipose - Visceral (Omentum)	15623
Adrenal Gland	15332
Artery - Aorta	15172
Artery - Coronary	15517
Artery - Tibial	14714
Brain - Amygdala	15816
Brain - Anterior cingulate cortex (BA24)	15867
Brain - Caudate (basal ganglia)	16136
Brain - Cerebellar Hemisphere	16207
Brain - Cerebellum	16473
Brain - Cortex	16178
Brain - Frontal Cortex (BA9)	16020
Brain - Hippocampus	15910
Brain - Hypothalamus	16412
Brain - Nucleus accumbens (basal ganglia)	16153
Brain - Putamen (basal ganglia)	15768
Brain - Spinal cord (cervival c-1)	15838
Brain - Substantia nigra	15796
Breast - Mammary Tissue	16311
Cells - Cultured fibroblasts	13737
Cells - EBV-transformed lymphocytes	13743
Colon - sigmoid	15635
Colon - Transverse	16491
Esophagus - Gastroesophageal Junction	15459
Esophagus - Mucosa	15509
Esophagus - Muscularis	15355
Heart - Atrial Appendage	15003
Heart - Left Ventricle	14036
Kidney - Cortex	16054
Liver	14376
Lung	16616
Minor Salivary Gland	16412
Muscle - Skeletal	13331
Nerve - Tibial	16468
Ovary	15987
Pancreas	14857
Pituitary	17445
Prostate	17065
Skin - Not Sun Exposed (Suprapubic)	16079
Skin - Sun Exposed (Lower leg)	16097
Small Intestine - Terminal Ileum	16901
Spleen	16597
Stomach	15990
Testis	21913
Thyroid	16704
Uterus	15946
Vagina	16538
Whole Blood	13066
